# Supplementary material
Source: PubMed Central journal article supplement (PMC2268811)
Supplement: pnas_0709717105_1.pdf [file pnas_0709717105_1.pdf]

**Table 2. Conditional ligands tested**

| Allele | Sequence         | Refolding efficiency<br>Thermostability<br>UV-sensitivity | Allele           | Sequence         | Refolding efficiency<br>Thermostability<br>UV-sensitivity |         |
|--------|------------------|-----------------------------------------------------------|------------------|------------------|-----------------------------------------------------------|---------|
| HLA-A1 | STDJGVLEY        | +                                                         | HLA-A11          | AIFQJSMTK        | +                                                         |         |
|        | STDPJVLEY        | -(LD)                                                     |                  | AIFQSSMJK        | --- (TI)                                                  |         |
|        | STDPGJLEY        | ++                                                        |                  | ATFQJSMTK        | --- (LR)                                                  |         |
|        | STDPGVJEY        | +                                                         |                  | ATFQSSMJK        | -- (ND)                                                   |         |
|        | STDPGVLJY        | -(LD)                                                     |                  | RVFAFSEJK        | -- (ND)                                                   |         |
|        |                  |                                                           |                  | <b>RVFAJSFIK</b> | <b>Candidate</b>                                          |         |
|        |                  |                                                           |                  | HLA-B7           | APRJPTLAL                                                 | -(LD)   |
|        | <b>STAPGJLEY</b> | <b>Candidate</b>                                          |                  |                  | APRGJTLAL                                                 | ++      |
|        | STEPGJLEK        | --- (LR)                                                  |                  |                  | APRGJLAL                                                  | -(LD)   |
|        | STDPGJLEF        | --- (TI)                                                  |                  |                  | APRGPTJAL                                                 | -- (ND) |
| HLA-A3 | RLYJGGATK        | -(LD)                                                     | APRGPTLJL        | --- (LR)         |                                                           |         |
|        | RLYRJGATK        | ++                                                        |                  |                  |                                                           |         |
|        | RLYRGGAJK        | -LD                                                       | <b>AARGJTLAM</b> | <b>Candidate</b> |                                                           |         |
|        |                  |                                                           | AARGJTLAL        | ++               |                                                           |         |
|        | <b>RIYRJGATR</b> | <b>Candidate</b>                                          | APRGJTLAM        | ++               |                                                           |         |
|        | RGYRJGATY        | --- (TI)                                                  |                  |                  |                                                           |         |
|        | RLYRJGATL        | --- (LR)                                                  |                  |                  |                                                           |         |
|        |                  |                                                           |                  |                  |                                                           |         |

Overview of the peptides tested for each of the four HLA molecules. **J** indicates 3-amino-3-(2-nitro)phenyl-propionic acid. Sequences in the top part of each panel reflect the peptides used in a first screen. Arrows indicate which peptides were chosen as leads for a second screen (bottom parts). For HLA-A11, a panel of high and low affinity binders was tested in a single screen with **J** at two different positions. The four conditional ligands selected for further analysis are depicted in bold. LR: low refolding efficiency, TI: thermo-instable, ND: no UV-mediated degradation, LD: low UV-mediated degradation.
