# Supplementary material
Source: PubMed Central journal article supplement (PMC2268811)
Supplement: pnas_0709717105_2.pdf [file pnas_0709717105_2.pdf]

**Table 3. Peptide library scanned for HLA-A3 binding**

| Protein                      | Sequence   | Inhibition | SD | Protein    | Sequence   | Inhibition | SD | Protein | Sequence         | Inhibition | SD |
|------------------------------|------------|------------|----|------------|------------|------------|----|---------|------------------|------------|----|
| Tyrosinase-related protein 2 | TLLGGRPYR  | 84         | 1  | Tyrosinase | VSSKNLMEK  | 74         | 3  | GPI00   | <u>L</u> YRRRLMK | 90         | 2  |
|                              | GTYEGLLR   | 83         | 2  |            | YMVPFIPLYR | 72         | 2  |         | IALNFFGSOK       | 86         | 1  |
|                              | VLLAFLQYR  | 74         | 11 |            | SLLCRHKRK  | 70         | 2  |         | GATLRLVK         | 84         | 2  |
|                              | RMVNMVPPF  | 69         | 6  |            | GLVSLCRHK  | 64         | 5  |         | ALLAVGATK        | 83         | 1  |
|                              | LMETHLSSK  | 62         | 2  |            | SIFEQWLQR  | 63         | 4  |         | <u>ALNFFGSOK</u> | 80         | 2  |
|                              | VMSLHNLVH  | 59         | 8  |            | KSYLEQASR  | 60         | 0  |         | QLRALDGGNK       | 79         | 0  |
|                              | VLLAFLQYRR | 55         | 4  |            | KFFAYLTLAK | 51         | 4  |         | QLVLHQILK        | 72         | 3  |
|                              | LLRRNQMG   | 48         | 1  |            | MVPFIPLYR  | 43         | 7  |         | GVSRLRTK         | 72         | 2  |
|                              | FLLSCLGCK  | 47         | 5  |            | TQYESGMDK  | 36         | 3  |         | QLRTKAWNR        | 62         | 1  |
|                              | GLLRNQMG   | 46         | 2  |            | FMGFNCNCK  | 36         | 3  |         | QVWGGQPVY        | 59         | 4  |
|                              | MTVDSLUNK  | 42         | 1  |            | CVSSKNLMEK | 27         | 4  |         | VSCQGGLPK        | 58         | 10 |
|                              | FQNSTFSFR  | 41         | 8  |            | LVSLCRHK   | 26         | 7  |         | VLASLIYRR        | 54         | 2  |
|                              | AFDEWMKR   | 39         | 1  |            | FFAYLTLAK  | 22         | 1  |         | TVSCQGGLPK       | 49         | 1  |
|                              | VVISNRLLY  | 36         | 11 |            | VSLCRHKRK  | 19         | 1  |         | VVLASLIYR        | 45         | 3  |
|                              | ILEHVRKEK  | 30         | 1  |            | LLRWEQEIQK | 14         | 2  |         | GALLAVGATK       | 38         | 1  |
|                              | FLGALDLAK  | 27         | 0  |            | ALLGGSEIWR | 2          | 0  |         | HTMEVTVYH        | 35         | 4  |
|                              | HVRKEKATK  | 27         | 3  |            | SMHNALHIYM | 0          | 2  |         | ILKGGSGTY        | 30         | 2  |
|                              | PLMETHLSSK | 27         | 3  |            | YMVPFIPLY  | 0          | 2  |         | SLIYRRRLMK       | 30         | 7  |
|                              | QVMSLHNLVH | 21         | 6  |            | NIFDLSAPEK | -1         | 1  |         | LVLKRCLLH        | 29         | 7  |
|                              | FLGALDLAKK | 19         | 1  |            | IPIGTYGQMK | -3         | 1  |         | SSHWLRLPR        | 20         | 1  |
|                              | NSMKLPTLK  | 14         | 1  |            | QLSGRGSCQ  | -4         | 2  |         | TVYHRRGSR        | 18         | 6  |
|                              | SLVKECCPR  | 7          | 1  |            | DLSAPEKDK  | -4         | 2  |         | RQLRTKAWNR       | 15         | 3  |
|                              | TLLGGRPY   | 3          | 1  |            | HIYMNGTMSQ | -4         | 3  |         | QKRSFVYVVK       | 14         | 4  |
|                              | LLAFLQYRR  | 3          | 4  |            | HFPRACVSSK | -4         | 1  |         | LGVSRLRTK        | 11         | 1  |
|                              | CMTVDSLUNK | 2          | 1  |            | PLRRNPGNH  | -4         | 1  |         | LIVRRRLMKQ       | 9          | 3  |
|                              | GFLSCLGCK  | 1          | 1  |            | ALLAGLVS   | -5         | 2  |         | QILKGGSGTY       | 7          | 1  |

| Protein                      | Sequence          | Inhibition | SD       | Protein      | Sequence         | Inhibition | SD       | Protein      | Sequence    | Inhibition | SD |
|------------------------------|-------------------|------------|----------|--------------|------------------|------------|----------|--------------|-------------|------------|----|
| Tyrosinase-related protein 1 | SLSPQEREQF        | 0          | 3        | <b>Nodal</b> | RLPSSADVEF       | -5         | 2        | <b>Mart1</b> | CWRGGQVSLK  | 6          | 4  |
|                              | DIRDCLSLQK        | 0          | 1        |              | PIGTYGQMK        | -5         | 0        |              | AESTGMTPEK  | 5          | 2  |
|                              | FLNGTNALPH        | 0          | 1        |              | WLLGAAMVG        | -5         | 2        |              | CQLVLHQILK  | 3          | 3  |
|                              | TTNILEHVRK        | -1         | 1        |              | VLYCLLWSFQ       | -5         | 1        |              | YLAEADLSY   | 2          | 1  |
|                              | AFLQYRRLRK        | -1         | 1        |              | LLAGLVSLIC       | -6         | 1        |              | AVVLASLYR   | 1          | 1  |
|                              | RLRKGYTPLM        | -1         | 3        |              | SYMVPFIPLY       | -8         | 1        |              | GLSIGTGRAM  | 0          | 3  |
|                              | RKFFHRTCK         | -1         | 0        |              | RLLVRRNIFD       | -8         | 1        |              | ILLVLMVVL   | -1         | 2  |
|                              | QFLGALDLAK        | -1         | 2        |              | YDLFVWMHYI       | -8         | 0        |              | ALQLHDPSGY  | -1         | 1  |
|                              | RLGAESANVC        | -2         | 1        |              | PLYRNGDFF        | -9         | 1        |              | AVGATKVPR   | -2         | 1  |
|                              | LVTLNNGTY         | -3         | 1        |              | NLLSPASFF        | -9         | 2        |              | AVVLASLYI   | -2         | 3  |
|                              | ILPGAQQQF         | -4         | 1        |              | RLLYRRNIF        | -9         | 2        |              | TLIGANASF   | -4         | 1  |
|                              | FLQYRRLRK         | -4         | 1        |              | <b>HAYIQSLK</b>  | <b>90</b>  | <b>1</b> |              | AVIGALLAVG  | -4         | 1  |
|                              | FVLLAFLQY         | -4         | 1        |              | <b>SLYRDPLPR</b> | <b>88</b>  | <b>1</b> |              | AVIGALLAV   | -4         | 1  |
|                              | RLIGNESFA         | -4         | 1        |              | <b>KTKPLSMLY</b> | <b>74</b>  | <b>2</b> |              | VLYRYGSFS   | -4         | 1  |
|                              | ALVGLFVLLA        | -5         | 3        |              | <b>RVAGECWPR</b> | <b>67</b>  | <b>3</b> |              | YLEFGPVTA   | -5         | 1  |
|                              | KILPGAQQQF        | -5         | 1        |              | VTRPLSKWLK       | 57         | 3        |              | LISRALVVTH  | -5         | 1  |
|                              | ALDLAKKRVH        | -6         | 1        |              | ATVATALLR        | 56         | 1        |              | LLVLMVVL    | -5         | 1  |
|                              | TLISRSRF          | -7         | 1        |              | STCCAPVTKT       | 54         | 3        |              | TLISRALVV   | -6         | 0  |
|                              | SVYDFFVWLH        | -7         | 0        |              | ATNVLLMLY        | 44         | 9        |              | QVLGGPVSG   | -6         | 1  |
|                              | RMYNMVPFFP        | -7         | 1        |              | LAYMLSLYR        | 38         | 8        |              | QVPLDCVLY   | -6         | 2  |
|                              | NILEHVRKEK        | -7         | 2        |              | WLKRPGALEK       | 36         | 8        |              | PLLDGTATL   | -7         | 1  |
|                              | RLLYNATTN         | -8         | 1        |              | HAYIQSLKR        | 24         | 5        |              | FLRNQPLTF   | -7         | 2  |
|                              | RLLYNATTNI        | -8         | 1        |              | IYPKQYNAY        | 14         | 2        |              | KVLPDGGQVIW | -7         | 2  |
|                              | FVWLHYYSVR        | -8         | 2        |              | AIEIFHPK         | 12         | 10       |              | KVLPDGOVI   | -8         | 2  |
|                              | <b>ASVLRARR</b>   | <b>83</b>  | <b>2</b> |              | VLEVTRPLSK       | 8          | 1        |              | HVGTQCALTR  | 0          | 1  |
|                              | <b>SLPYWNFATR</b> | <b>77</b>  | <b>4</b> |              | LKRPGALEK        | -1         | 1        |              | AHFTYGYPKK  | -3         | 2  |
|                              | GLFDTPPFY         | 60         | 3        |              | ALLQAGAAT        | -3         | 2        |              | VLLLIGCWY   | -4         | 2  |
|                              | LTWHRYHLRL        | 55         | 10       |              | LLQAGAATV        | -4         | 1        |              | GVLLLIGCWY  | -4         | 1  |

| Protein | Sequence   | Inhibition | SD | Protein | Sequence   | Inhibition | SD | Protein | Sequence   | Inhibition | SD |
|---------|------------|------------|----|---------|------------|------------|----|---------|------------|------------|----|
|         | AVFDEWLRR  | 53         | 4  |         | GWGSIHYPK  | -4         | 2  |         | RDSKVSLEK  | -4         | 0  |
|         | WTHYYSVKK  | 47         | 4  |         | MLYSNLSQE  | -5         | 1  |         | DAHFIYGYPK | -5         | 1  |
|         | FVWTHYYSVK | 42         | 6  |         | ALLQAGATV  | -6         | 2  |         | LLIGCWYCR  | -8         | 3  |
|         | LPYWNFAFRK | 18         | 7  |         | SPLAYMLSLY | -6         | 3  |         | LLIGCWYCR  | -8         | 2  |
|         | NVAPMVQR   | 17         | 2  |         | AVDGGQWTF  | -6         | 0  |         |            |            |    |
|         | YSNSTNSFR  | 9          | 4  |         | ALLRTRGQP  | -6         | 2  |         |            |            |    |
|         | ALIFGTASY  | 8          | 2  |         | TVTLSQVTF  | -7         | 1  |         |            |            |    |
|         | KLLSLGCI   | 2          | 1  |         | LLMYSNLSQ  | -7         | 1  |         |            |            |    |
|         | EIIAIAVVG  | -1         | 4  |         | NHAYIQSLK  | -8         | 2  |         |            |            |    |
|         | FVRALDMAK  | -3         | 1  |         | NLIGGWSWI  | -8         | 1  |         |            |            |    |
|         | ALLVAFJG   | -3         | 0  |         | QLGGSTLLW  | -8         | 2  |         |            |            |    |
|         | TLISPSNVF  | -3         | 2  |         | PLAYMLSLY  | -8         | 1  |         |            |            |    |
|         | FLNGTGGQTH | -3         | 2  |         | PLAYMLSLYR | -10        | 1  |         |            |            |    |
|         | ALLVALIF   | -3         | 1  |         |            |            |    |         |            |            |    |
|         | ILGPDGNT   | -4         | 1  |         |            |            |    |         |            |            |    |
|         | AVRSLHNLAH | -4         | 3  |         |            |            |    |         |            |            |    |
|         | NLLDLSKEEK | -4         | 1  |         |            |            |    |         |            |            |    |
|         | AVGALLVA   | -5         | 2  |         |            |            |    |         |            |            |    |
|         | ALDMAKRTH  | -5         | 1  |         |            |            |    |         |            |            |    |
|         | FVRALDMAKR | -5         | 1  |         |            |            |    |         |            |            |    |
|         | HRYHLLRLEK | -6         | 1  |         |            |            |    |         |            |            |    |
|         | CIFFPLLFQ  | -7         | 0  |         |            |            |    |         |            |            |    |
|         | ALIFGTASYL | -7         | 2  |         |            |            |    |         |            |            |    |
|         | SIYNYFVWTH | -8         | 1  |         |            |            |    |         |            |            |    |

Two hundred three predicted HLA-A3 ligands from six melanoma-associated proteins were selected based on three binding prediction algorithms. In an initial screen, peptides were screened at 5  $\mu$ M in a 45-hour FP competition assay format. Peptides in bold were chosen for further analysis to determine IC<sub>50</sub> values. Underlined peptides represent

previously described HLA-A3 ligands. Inhibition reflects the percentage reduction in polarization of the tracer peptide.

Values represent mean  $\pm$  SD of triplicate samples.
